# Supplementary material
Source: publisher site journal article supplement (https://www.dovepress.com/article/343948)

**Supplemental Material**

| **Supplemental table 1**: The mRNA levels of CBXs in different types of BC tissues and normal tissues at transcriptome level. | | | | | | | | | |
| --- | --- | --- | --- | --- | --- | --- | --- | --- | --- |
| **Name** | **Types of BC VS. Nomal tissues** | **Fold**  **Change** | | | **P Value** | **t-test** | | | **Reference or Source** |
| **CBX2** | Ductal Breast Carcinoma | | 9.378 | 1.25E-15 | | | 11.926 | Richardson A1 | |
|  | Medullary Breast Carcinoma | | 4.737 | 3.13E-13 | | | 11.293 | Curtis C2 | |
|  | Invasive Ductal Breast Carcinoma | | 2.147 | 3.58E-73 | | | 22.063 | Curtis C2 | |
|  | Invasive Ductal Breast Carcinoma | | 3.254 | 2.51E-32 | | | 14.536 | TCGA | |
|  | Invasive Breast Carcinoma | | 2.644 | 4.74E-12 | | | 7.600 | TCGA | |
| **CBX3** | Invasive Ductal Breast Carcinoma | | 2.328 | 5.73E-04 | | | 3.923 | Turashvili G3 | |
|  | Ductal Breast Carcinoma | | 2.498 | 8.88E-09 | | | 8.528 | Richardson A1 | |
|  | Invasive Breast Carcinoma | | 2.523 | 0.001 | | | 7.871 | Gluck S4 | |
|  | Intraductal Cribriform Breast Adenocarcinoma | | 2.375 | 0.002 | | | 5.414 | TCGA | |
| **CBX4** | Invasive Lobular Breast Carcinoma | | 2.253 | 1.62E-14 | | | 9.097 | TCGA | |
|  | Invasive Breast Carcinoma | | 2.558 | 3.57E-20 | | | 10.777 | TCGA | |
|  | Male Breast Carcinoma | | 3.321 | 3.00E-05 | | | 12.040 | TCGA | |
|  | Invasive Ductal Breast Carcinoma | | 2.604 | 1.19E-24 | | | 14.212 | TCGA | |
| **CBX8** | Invasive Breast Carcinoma | | 2.048 | 1.10E-16 | | | 9.411 | TCGA | |
|  | Male Breast Carcinoma | | 2.326 | 5.81E-04 | | | 10.501 | TCGA | |

1. Richardson AL, Wang ZC, De Nicolo A, Lu X, Brown M, Miron A, Liao X, Iglehart JD, Livingston DM and Ganesan S. X chromosomal abnormalities in basal-like human breast cancer. Cancer Cell. 2006; 9(2):121-132.

2. Curtis C, Shah SP, Chin SF, Turashvili G, Rueda OM, Dunning MJ, Speed D, Lynch AG, Samarajiwa S, Yuan Y, Gräf S, Ha G, Haffari G, et al. The genomic and transcriptomic architecture of 2,000 breast tumours reveals novel subgroups. Nature. 2012; 486(7403):346-352.

3. Turashvili G, Bouchal J, Baumforth K, Wei W, Dziechciarkova M, Ehrmann J, Klein J, Fridman E, ductal invasive breast carcinomas by laser microdissection and microarray analysis. BMC Cancer. 2007; 7:55.

4. Glück S, Ross JS, Royce M, McKenna EF, Jr., Perou CM, Avisar E and Wu L. TP53 genomics predict higher clinical and pathologic tumor response in operable early-stage breast cancer treated with docetaxel-capecitabine ± trastuzumab. Breast Cancer Res Treat. 2012; 132(3):781-791.

Supplemental figure S1. Correlation between immune cell infiltration and CBXs in Basal BC patients and Her-2 type BC determined by TIMER.


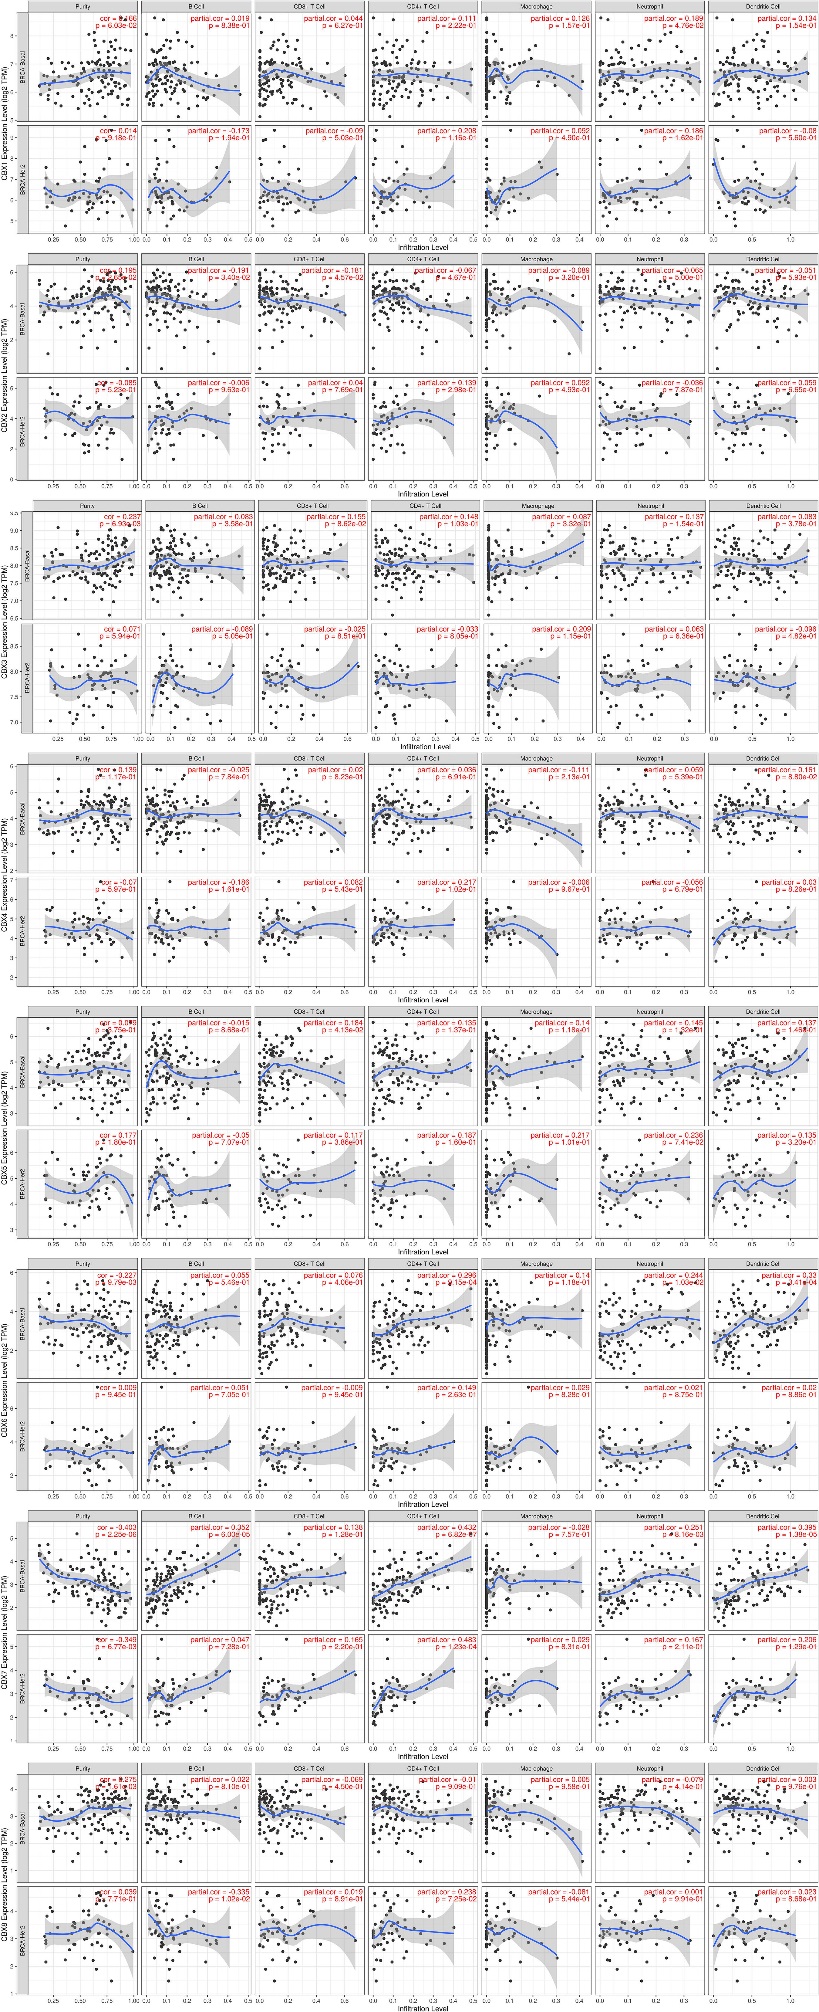

Supplement: Supplementary file 1 [file get_supplementary_file.php]
